# Supplementary material for: Loss of miR-200c up-regulates CYP1B1 and confers docetaxel resistance in renal cell carcinoma
Source: PubMed Central journal article supplement (PMC4480715; doi:10.18632/oncotarget.3484), 2015-03-08
Supplement: oncotarget-06-7774-s001.pdf [file oncotarget-06-7774-s001.pdf]

## **Loss of miR-200c up-regulates CYP1B1 and confers docetaxel resistance in renal cell carcinoma**

### **Supplementary Material**

#### **MATERIAL AND METHODS**

##### *Cell cycle analysis*

After A498 cells were stained with 4', 6-diamidino-2-phenylindole (DAPI), cell cycle was analyzed with a Cell Lab Quanta™ SC MPL (Beckman Coulter).

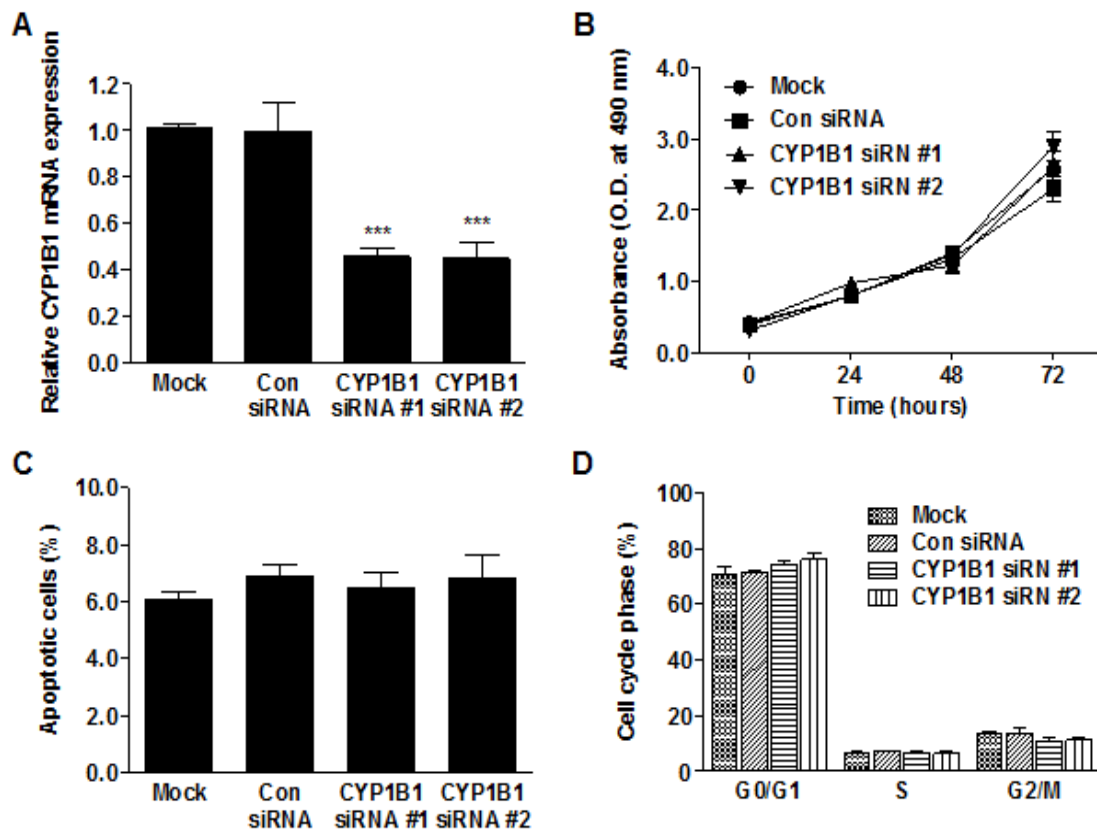

**Figure S1: No effect of CYP1B1 reduction on A498 cell survival, apoptosis and cell cycle.**

(A) CYP1B1 mRNA levels were determined by RT-PCR after CYP1B1 siRNA transfection.

\*\*\* $P < 0.001$

(B-D) Cell survival was analyzed by MTS assay (B), apoptotic cell death was measured with annexin V-FITC/7-AAD staining (C) and cell cycle progression was determined by DAPI staining (D) in A498 cells after CYP1B1 siRNA transfection.

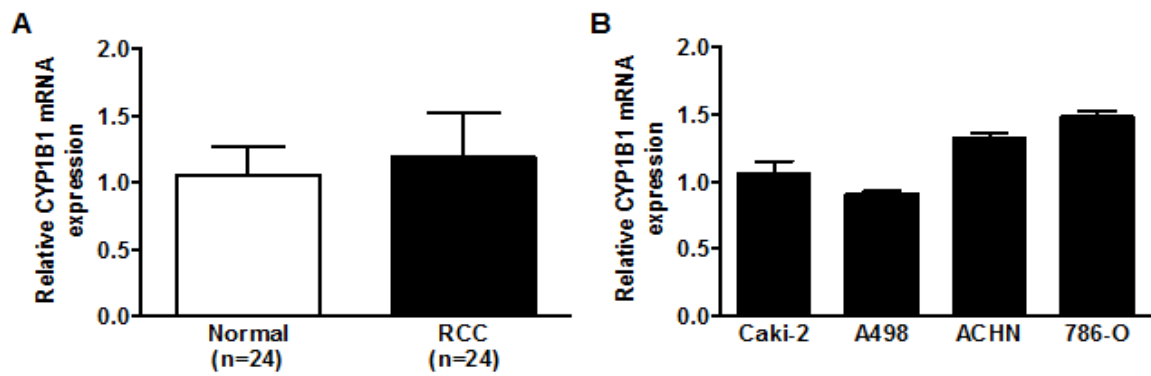

**Figure S2: CYP1B1 mRNA expression in RCC tissues (A) and cell lines (B).**

(A and B) CYP1B1 mRNA expression was determined by RT-PCR with RNA extracted from microdissected RCC tissues (A) and cells (B).

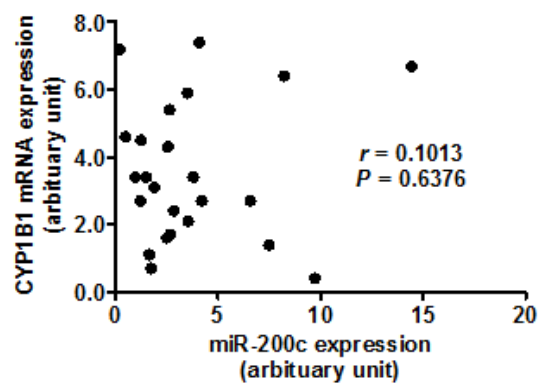

**Figure S3: No correlation between CYP1B1 mRNA levels and miR-200c expression in RCC tissues.**

Levels of CYP1B1 mRNA and miR-200c were determined by RT-PCR with RNA extracted from microdissected tissue samples. The relationship was analyzed with Pearson's correlation test.

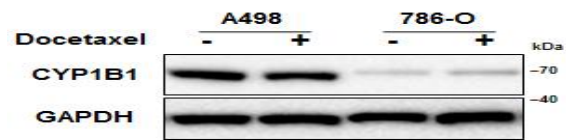

**Figure S4: No induction of CYP1B1 by docetaxel in RCC cells.**

CYP1B1 protein levels were determined by Western blot with total proteins harvested from cells treated with either vehicle or docetaxel (5 μM).

**Table S1: Patient and tumor characteristics from clinical samples used for miR-200c expression analysis**

| <b>Pathological variables</b> | <b>Total (n=24), n (%)</b> |
|-------------------------------|----------------------------|
| <b>Age</b>                    |                            |
| Mean $\pm$ SD, years          | 65.8 $\pm$ 7.4             |
| <b>Sex</b>                    |                            |
| Men                           | 17/24 (70.8)               |
| Women                         | 7/24 (29.2)                |
| <b>Histological type</b>      |                            |
| Clear cell                    | 20/24 (83.3)               |
| Papillary                     | 4/24 (16.7)                |
| <b>Tumor stage</b>            |                            |
| pT1                           | 10/24 (41.7)               |
| pT2                           | 6/24 (25.0)                |
| pT3                           | 3/24 (12.5)                |
| pT4                           | 5/24 (20.8)                |
| <b>Nuclear grade</b>          |                            |
| 1                             | 13/24 (54.2)               |
| 2                             | 7/24 (29.2)                |
| 3                             | 4/24 (16.7)                |
| 4                             | 0/24 (0)                   |
| <b>Vascular invasion</b>      |                            |
| Negative                      | 24/24 (100)                |
| Positive                      | 0/24 (0)                   |
| <b>Capsular invasion</b>      |                            |
| Negative                      | 24/24 (100)                |
| Positive                      | 0/24 (0)                   |
